# Supplementary material for: Naturally occurring germline and tumor-associated mutations within the ATP-binding motifs of PTEN lead to oxidative damage of DNA associated with decreased nuclear p53
Source: PubMed Central journal article supplement — Hum Mol Genet. 2010 Oct 6;20(1):80–9. doi: 10.1093/hmg/ddq434 (PMC3000677; doi:10.1093/hmg/ddq434), 2010-10-06
Supplement: supp_ddq434_ddq434supp.pdf [file supp_ddq434_ddq434supp.pdf]

## Supplementary Materials

### *Primers for Real-time qRT-PCR*

#### *GAPDH*

5'-GGGCTGCTTTTAACTCTGGTAA-3'

5'-ATGGGTGGAATCATATTGGAAC-3'

#### *TP53INP1*

5'-ATTGTGGGCTACGTGGAAAC-3'

5'-ATCTCATCCTGCCCAAACAC-3'

#### *p53*

5'-CTGTCCCTTCCCAGAAAACCT-3'

5'-GGGAGTACGTGCAAGTCACAGA-3'

#### *BAX*

5'-CCAGCTCTGAGCAGATCATG-3'

5'-TCAGCCCATCTTCTTCCAGA-3'

**Supplementary Figure S1. Analysis of PTEN and p53 expression under the tet-off expression system.** MCF-7 cells overexpressing PTEN-WT, K62R, Y65C or K125E were cultured in either the presence or the absence of Tet for 24 h. Exogenously expressed PTEN protein levels were determined by Western blot using an anti-FLAG antibody. p53 was detected by using a monoclonal antibody. Anti-alpha-tubulin antibody was used as a loading control

**Supplementary Figure S2. MG132 reverses p53 degradation in MCF-7 cells.** MCF-7 cells overexpressing PTEN-WT, K62R, Y65C or K125E were cultured in DMEM with 10  $\mu$ M MG-132 for 16 h. p53 protein intensity in MCF-7 cells determined by confocal microscope imaging and immunofluorescence. Cells were fixed and analyzed by immunofluorescence for endogenous p53 protein staining. p53 was detected with a polyclonal antibody followed by a goat anti-rabbit secondary antibody conjugated to Alexa Fluor 568 (red). Nuclei were counterstained with DAPI (blue).

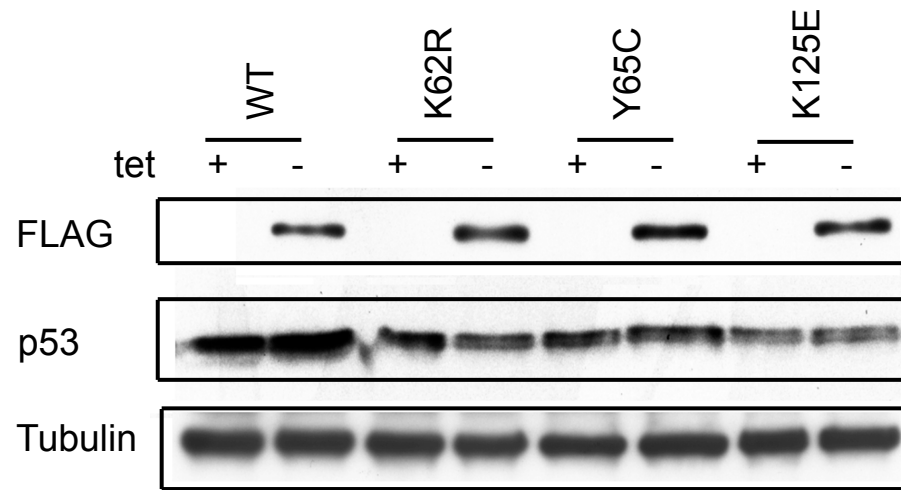

He X., Fig. S1

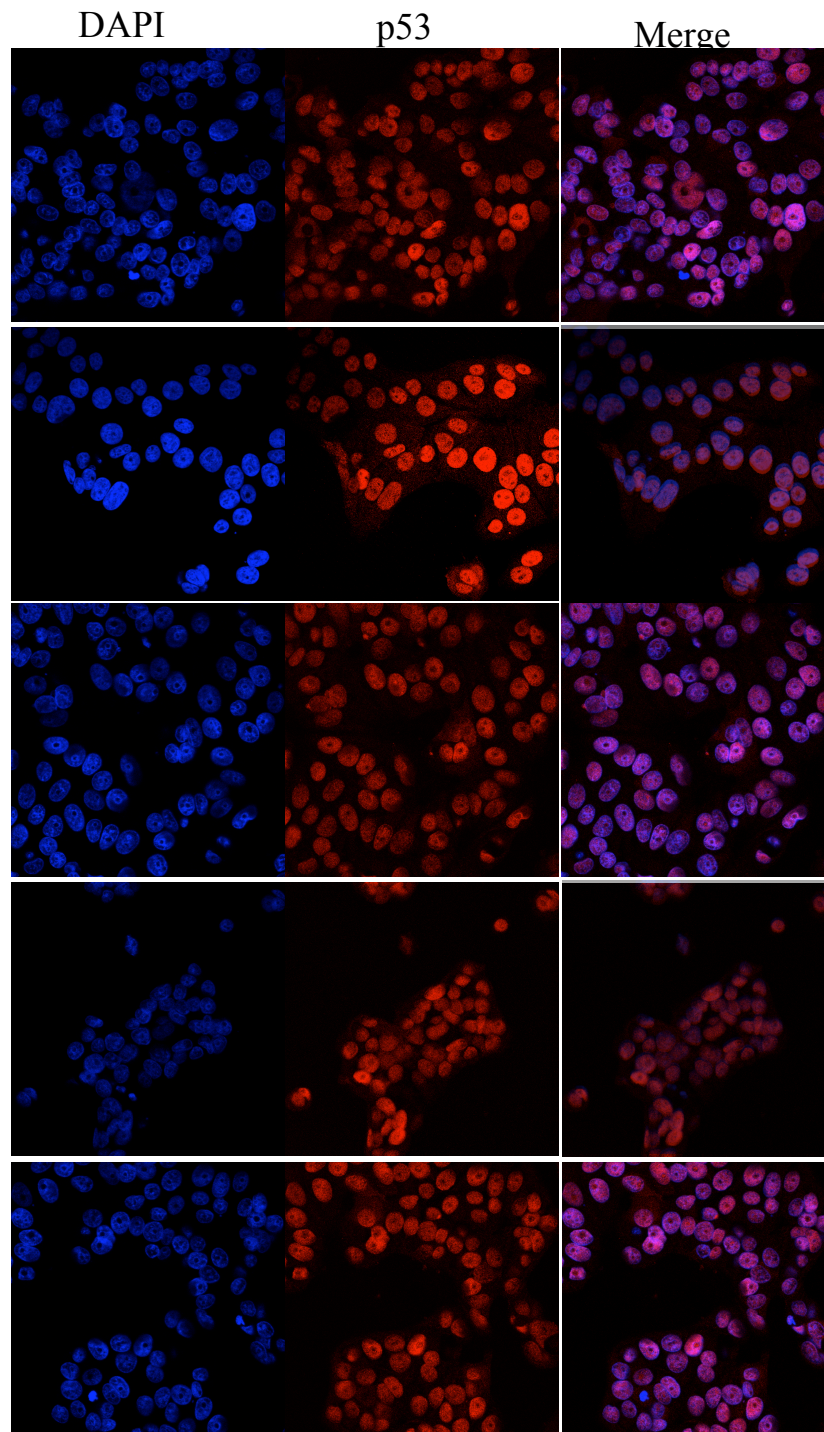

He X., Fig. S2
